# Supplementary material for: Selective Photo-Assisted Eradication of Triple-Negative Breast Cancer Cells through Aptamer Decoration of Doped Conjugated Polymer Nanoparticles
Source: MDPI journal article supplement (doi:10.3390/pharmaceutics14030626), 2022-03-12
Supplement: s1 [file s1]

# Supplementary Materials: Selective Photo-Assisted Eradication of Triple-Negative Breast Cancer Cells through Aptamer Decoration of Doped Conjugated Polymer Nanoparticles

## Supplementary Results

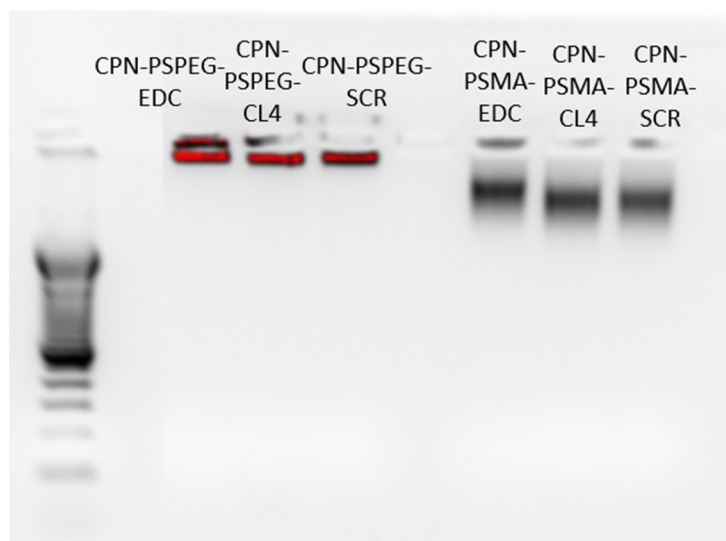

**Figure S1.** Aptamer-decorated CPN characterization. Gel electrophoresis of different CPN-PSMA and CPN-PSPEG nanoparticles in 1.5 % agarose gel.

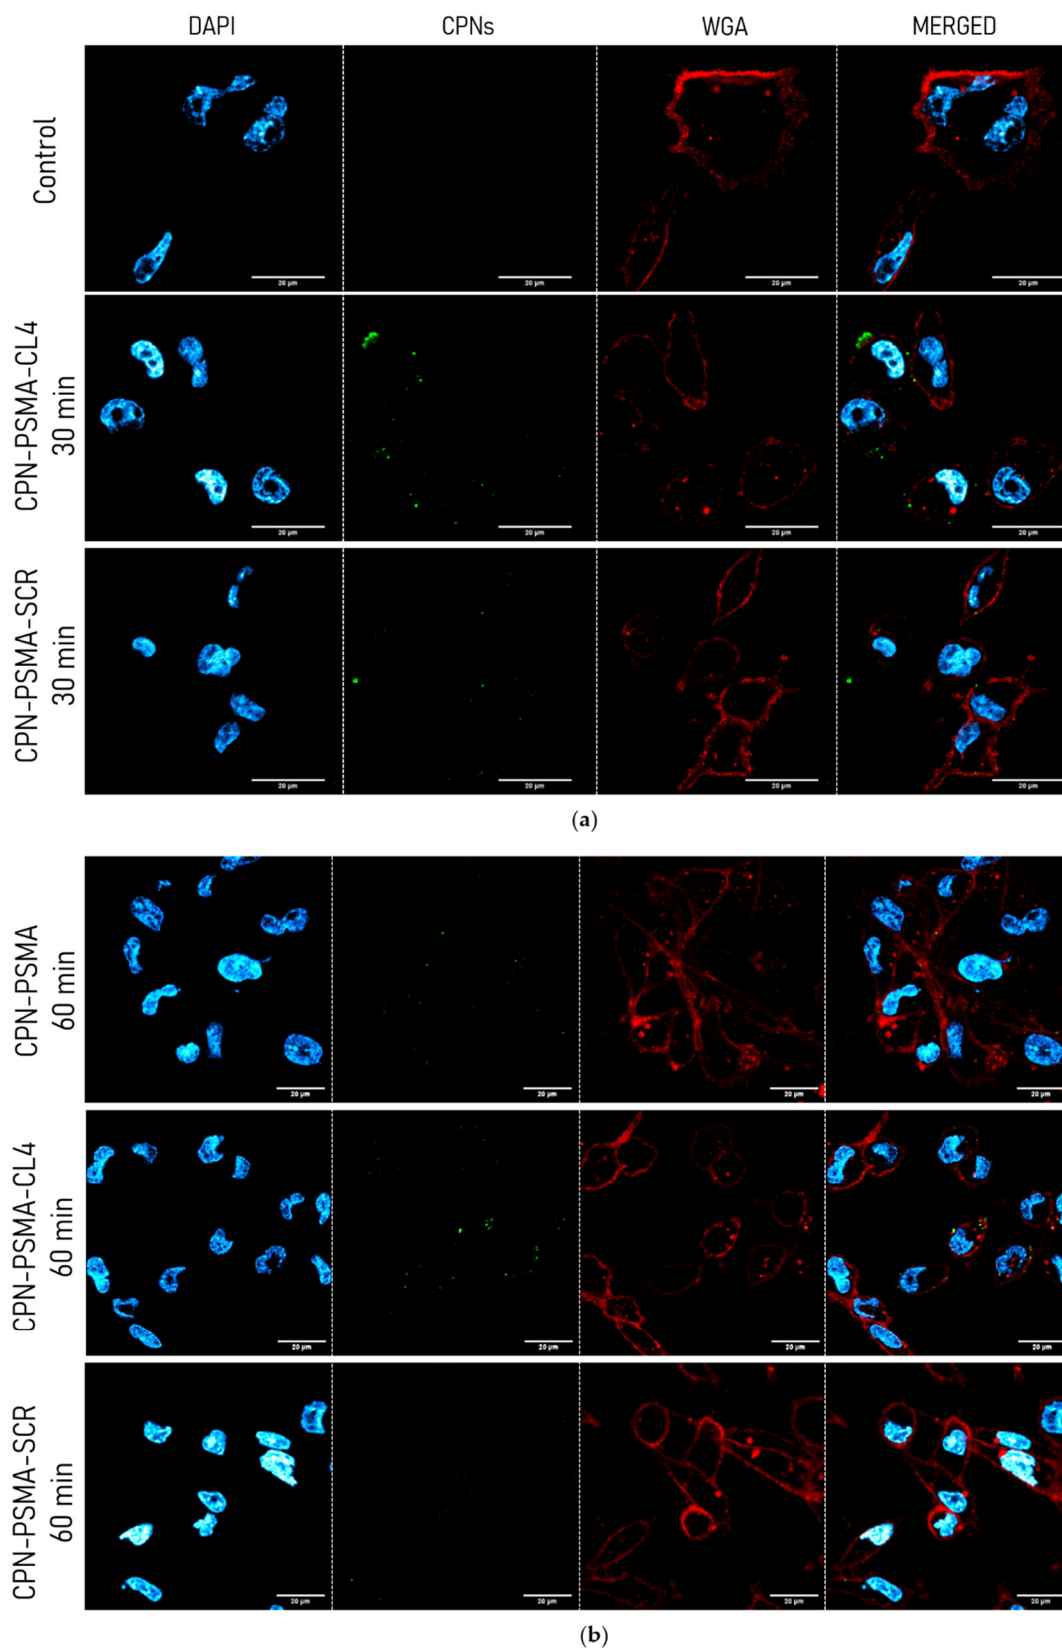

**Figure S2.** Uptake analysis of aptamer-decorated CPN in TNBC cells. Representative confocal microscopy images of MDA-MB-231 cells exposed to aptamer-decorated CPNs for different periods 30 (a) and 60 min (b) and stained with DAPI (nuclei) and WGA (cell membrane).

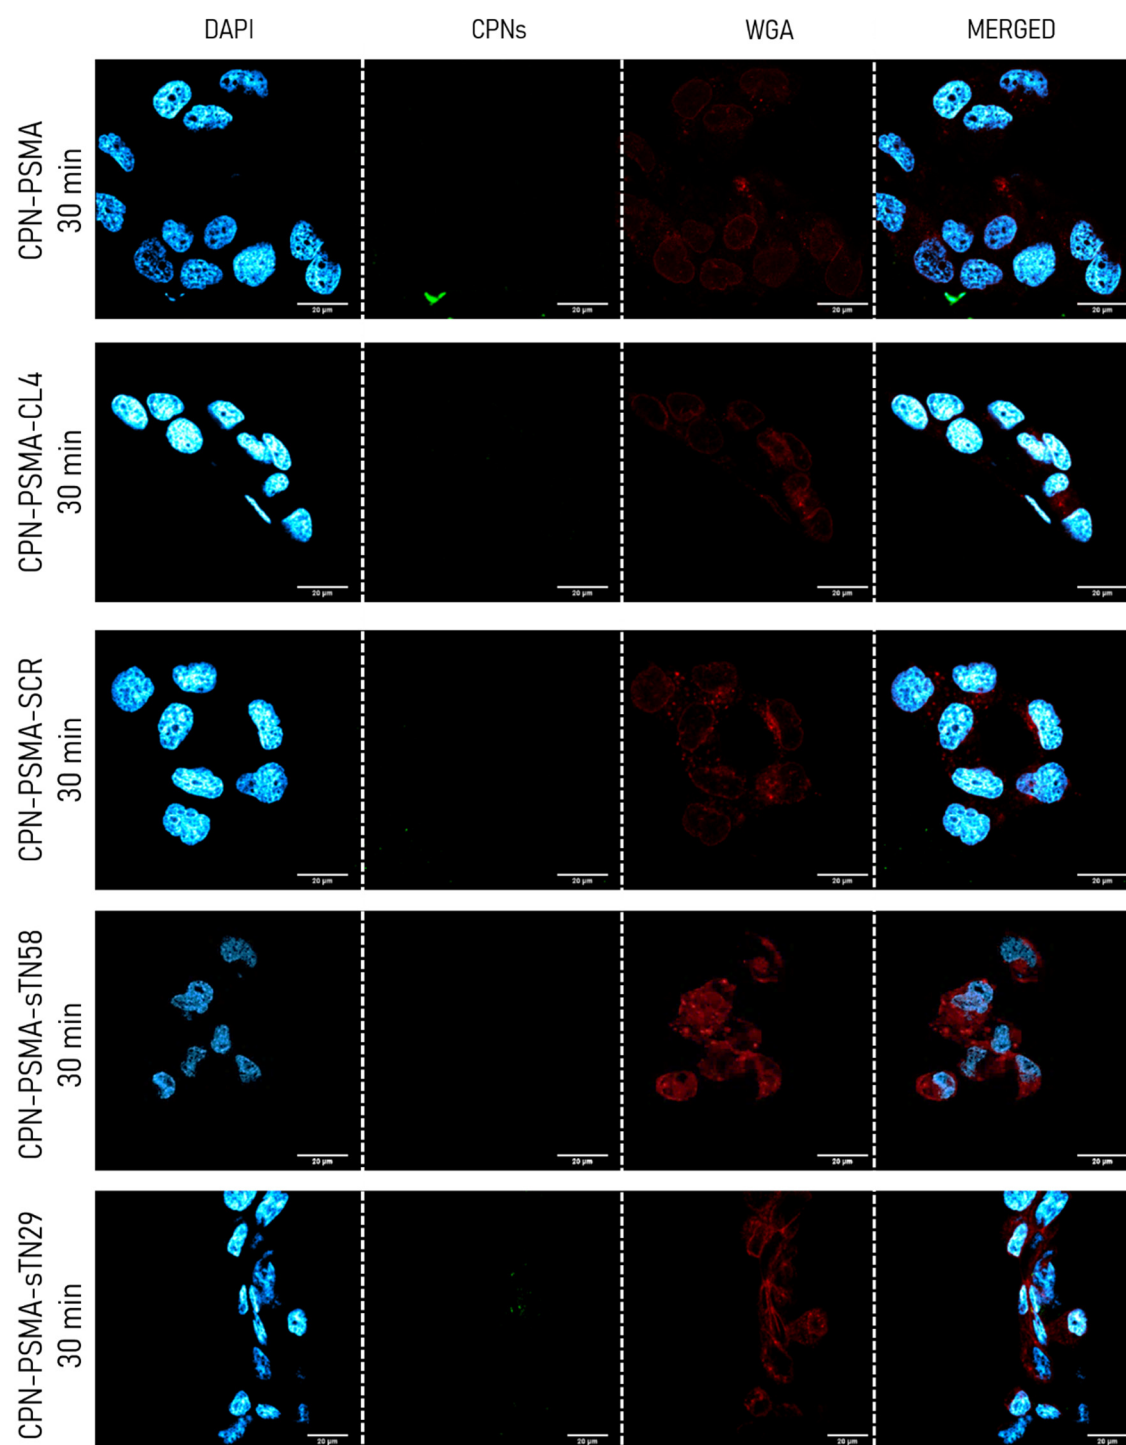

**Figure S3.** Uptake analysis of aptamer-decorated CPN in TPBC cells. Representative confocal microscopy images of non-TNBC BT-474 cells exposed to aptamer-decorated CPNs for 30 min and stained with DAPI (nuclei) and WGA (cell membrane).

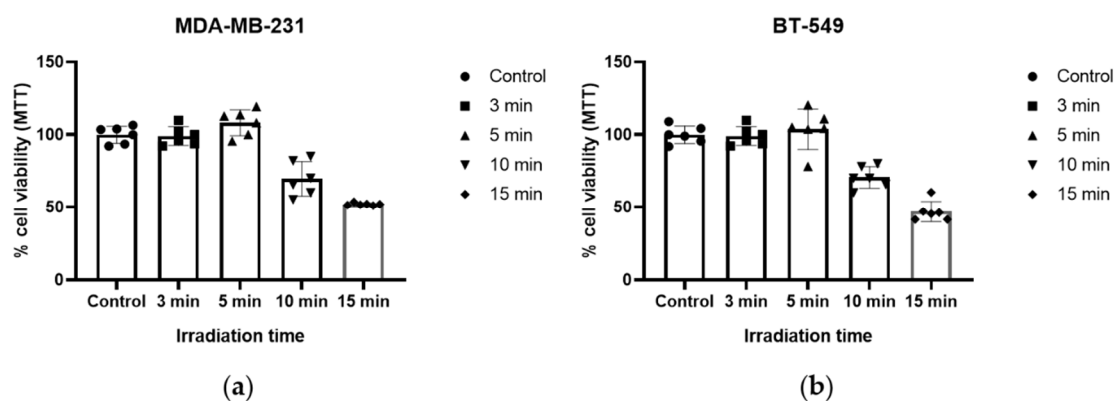

**Figure S4.** Light irradiance evaluation in TNBC cells. Cell viability in MDA-MB-231 (a) and BT-549 (b) cells exposed to light irradiance for different times at 50 mW/cm<sup>2</sup> of potency.

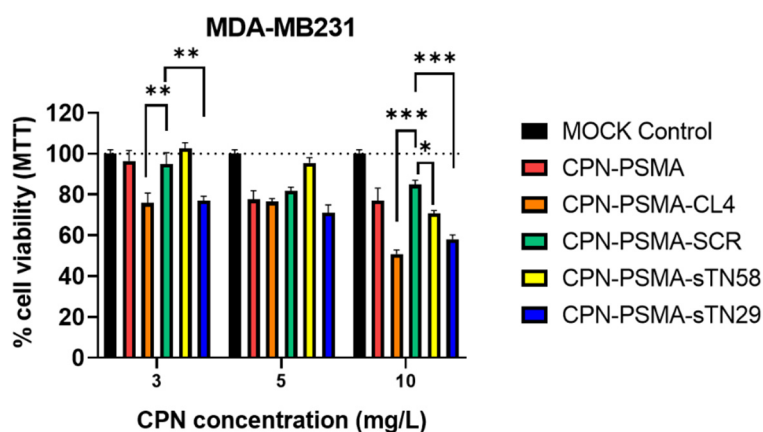

**Figure S5.** PDT efficacy with aptamer-decorated CPNs in TNBC cells. Cell viability in TNBC MDA-MB231 after 24 h of PDT with increasing concentration of different aptamer-decorated CPN-PSMA and unconjugated CPN-PSMA and a light dose of 10 J/cm<sup>2</sup>.
